# Supplementary material
Source: Springer Nature journal article supplement (https://www.springermedizin.de/resource/supplementary/12865_2004_64_MOESM4_ESM.pdf/9428478)

**A**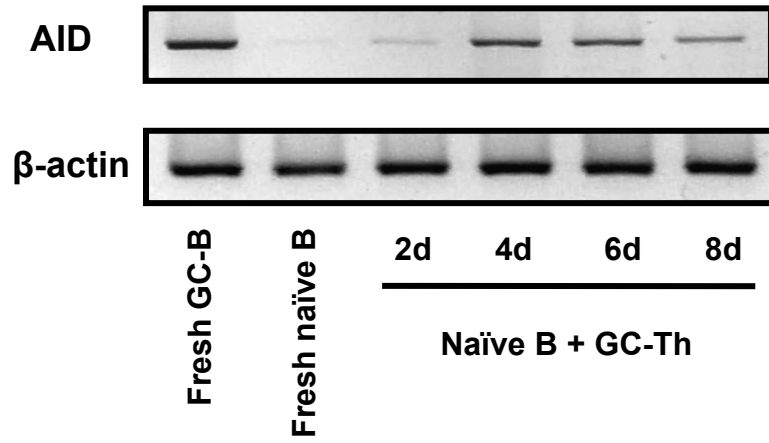**B**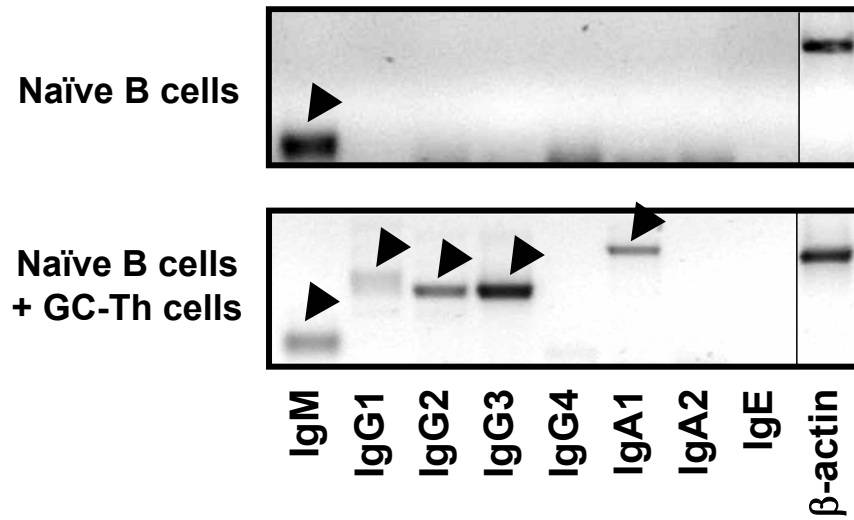**C**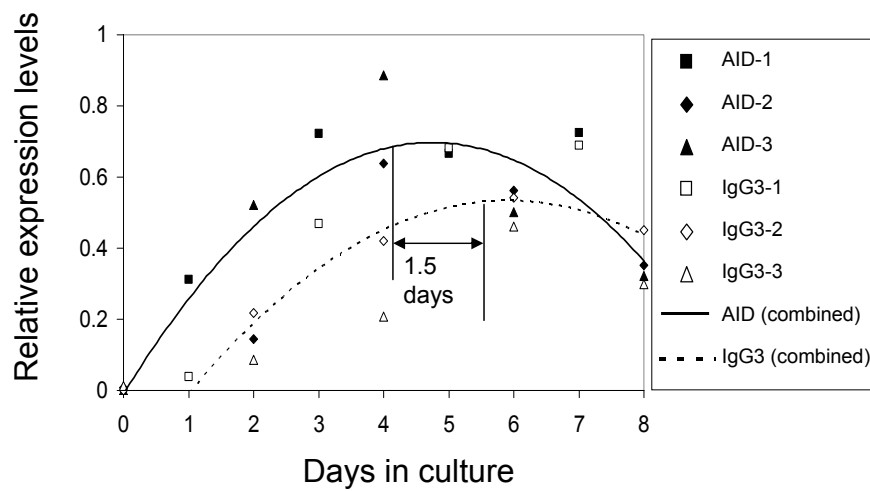**D**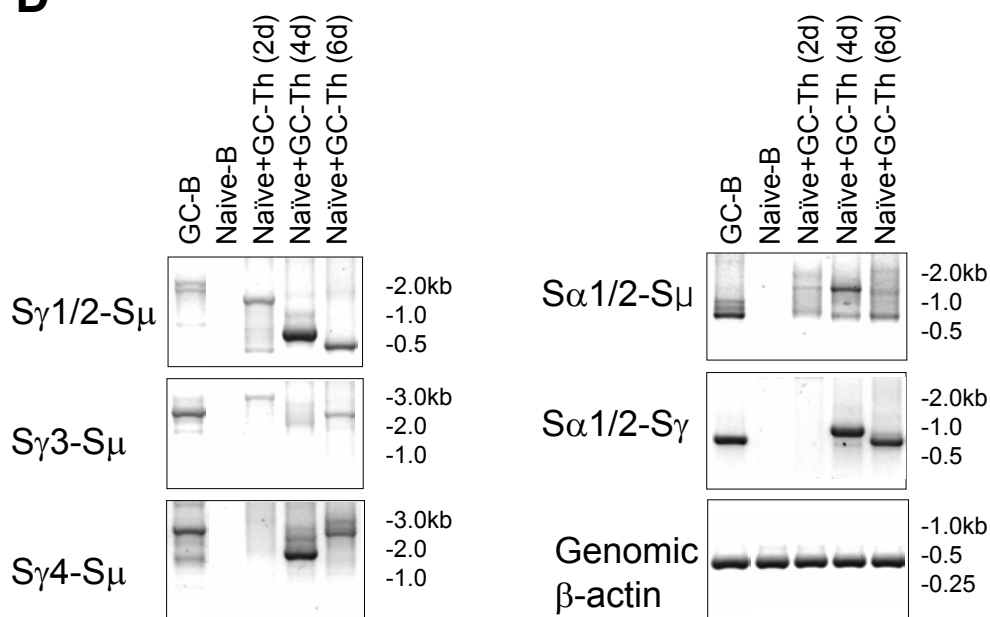**E**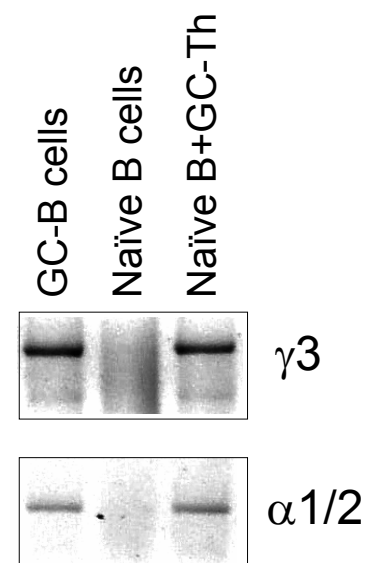

Supplement: MOESM4 [file 9428478]
